# Supplementary material for: Systematic Evaluation of Serotypes Causing Invasive Pneumococcal Disease among Children Under Five: The Pneumococcal Global Serotype Project
Source: PLOS journal article supplement (doi:10.1371/journal.pmed.1000348), 2010-10-05

**A**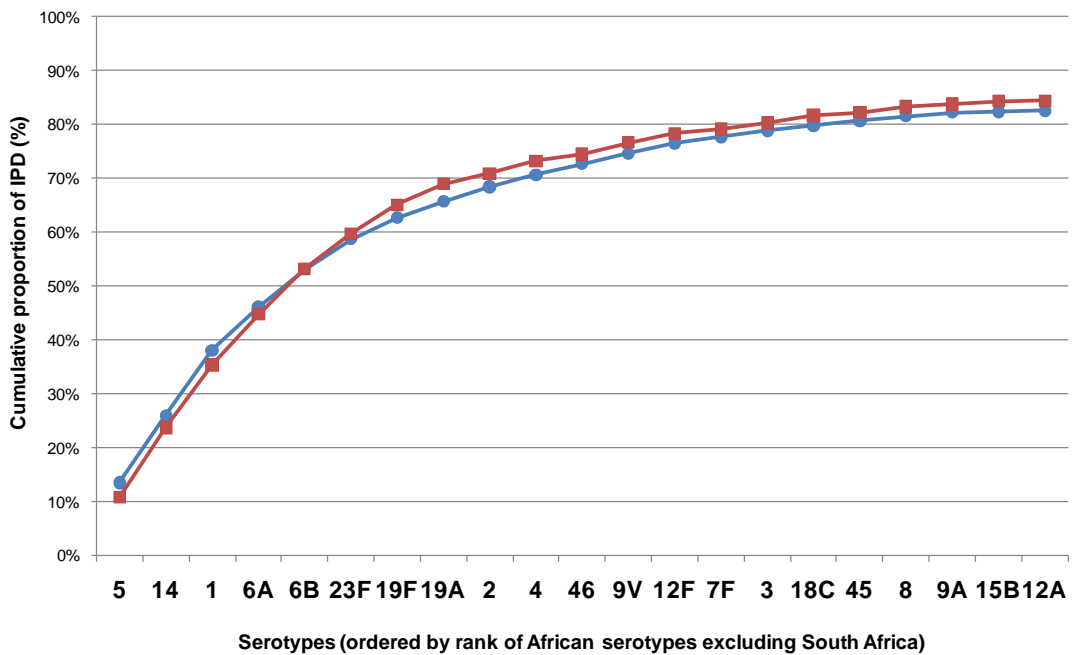**B**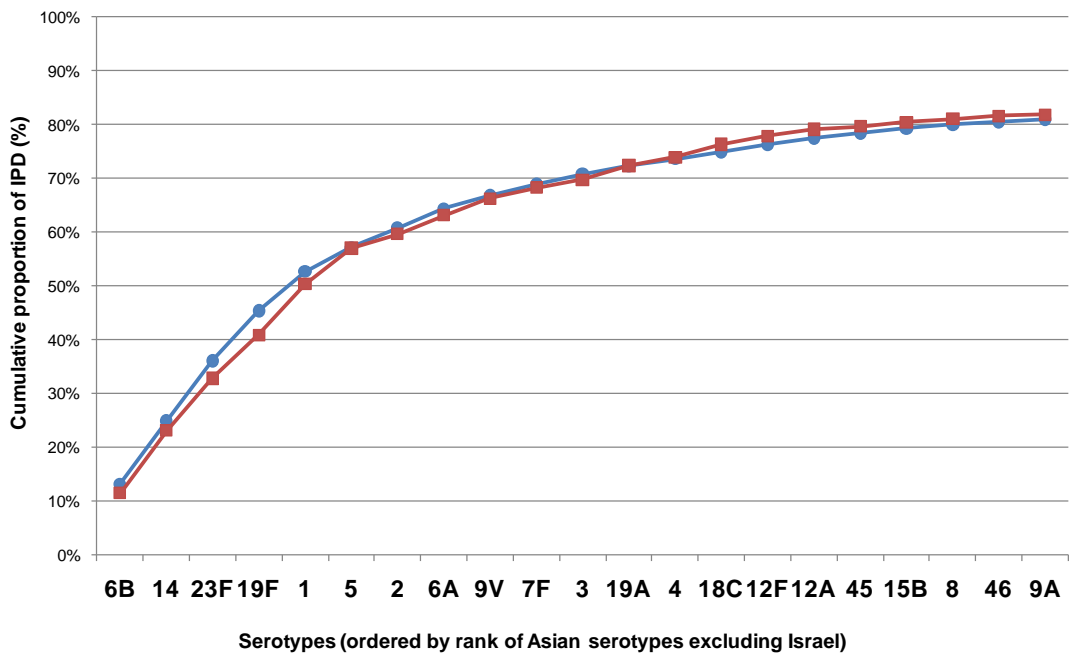

Supplement: S5 (10.1371/journal.pmed.1000348.s005) [file journal.pmed.1000348.s005]
